# Supplementary material
Source: publisher figshare collection journal article supplement (https://tandf.figshare.com/ndownloader/files/20282040)
Supplement: Supplementary file 1 [file 20282040]

**Supplementary materials for Gulliver, et al., “The Characteristics, Activities and Goals of Environmental Organizations Engaged in Advocacy within the Australian Environmental Movement”, *Environmental Communication*, 2019.**

**Table S1:** Study Population Exclusion Detail: Criteria Utilized for Identification of the Study Population

| Reason for exclusion                        | Further detail/operationalization                                                                                                                                                              | Total removed<br>from initial pool<br>of 2,668 |
|---------------------------------------------|------------------------------------------------------------------------------------------------------------------------------------------------------------------------------------------------|------------------------------------------------|
| Stage 1: preliminary check for key features |                                                                                                                                                                                                |                                                |
| No website                                  | Organizations with no online website found within the first twenty hits (two pages) of a google search for their exact organizational name (note: a social media page alone is not sufficient) | 647                                            |
| Website not in use                          | Organizations with domain names but no content on the site, or where the site had been utilized for a different non-environmental activity (for example, spam content)                         | 63                                             |
| No Australian activities                    | This included organizations with no Australian activities or where the organization was based outside of Australia.                                                                            | 65                                             |
| Non-environmental                           | Organizations without any connection to environmental issues were excluded (where environmental issues were defined as any named concerns around land, air and water resources)                | 520                                            |

---

Stage 2: detailed examination of each website

---

|                                |                                                                                                                                                                                                                                                                                                                                |     |
|--------------------------------|--------------------------------------------------------------------------------------------------------------------------------------------------------------------------------------------------------------------------------------------------------------------------------------------------------------------------------|-----|
| Think Tank/information site    | These were organizations that undertook no advocacy activities but instead operated as clearing houses for environmental related information, or specifically described their function as a think tank.                                                                                                                        | 30  |
| Environmental Remediation only | Organizations that did not undertake advocacy, instead focusing on environmental remediation. This included organizations undertaking revegetation projects, wildlife rehabilitation, plant and animal pest control, land management, and land protection measures such as establishing a conservation covenant on a property. | 581 |
| Industry Society               | Organizations that represent for-profit firms or industries (including umbrella trade associations) were excluded.                                                                                                                                                                                                             | 32  |
| Research Organization          | Research organizations were those that specifically stated their goals was to advance research on environmental issues.                                                                                                                                                                                                        | 28  |
| Business                       | Organizations that were self-described as businesses operating on a for-profit basis were excluded.                                                                                                                                                                                                                            | 17  |
| Legal Defender                 | Organizations with the primary function of defending clients in courts of law.                                                                                                                                                                                                                                                 | 11  |
| Local Planning                 | Organizations focused on a single local planning issue, such as a cruise port development, where environmental or ecological considerations were subsidiary or non-existent.                                                                                                                                                   | 34  |

|                                     |                                                                                                                                                                                                                                                                                                                                                                                                                                                                                    |      |
|-------------------------------------|------------------------------------------------------------------------------------------------------------------------------------------------------------------------------------------------------------------------------------------------------------------------------------------------------------------------------------------------------------------------------------------------------------------------------------------------------------------------------------|------|
| Government Body                     | Government organizations are those whose participants are exclusively government officials or government departments. This includes interstate commissions, government advisory boards, or elements of any government agency. If an organization includes government organizations as well as individuals or organizations from the private sector (for example, an umbrella organization or a joint government non-profit organization membership), we included the organization. | 20   |
| Political Party                     | Organizations registered or self-described as a political party.                                                                                                                                                                                                                                                                                                                                                                                                                   | 4    |
| Training Organization               | Organizations offering training and education as their sole function, either for profit or not-for-profit.                                                                                                                                                                                                                                                                                                                                                                         | 34   |
| Funding Body                        | Foundations that solely issue grants to environmental organizations were not included, unless they had some type of operational function active in environmental advocacy.                                                                                                                                                                                                                                                                                                         | 15   |
| No advocacy                         | Any organization which was not excluded from any of the previous categories, but also did not show any evidence of advocacy, campaigning or lobbying activities.                                                                                                                                                                                                                                                                                                                   | 66   |
| Unable to pdf site                  | Any organizations which met all previous criteria, but used online content management systems which blocked any attempts to convert the site to pdf.                                                                                                                                                                                                                                                                                                                               | 4    |
| Total Removed                       |                                                                                                                                                                                                                                                                                                                                                                                                                                                                                    | 2171 |
| Total remaining in study population |                                                                                                                                                                                                                                                                                                                                                                                                                                                                                    | 497  |

**Table S2:** Coded Attributes: Codes Used for Content Analysis across the Study Population Websites

| Codeable Attribute by Categories                                                                                                                                                                                                             |                                                                                                                                                                                                                                                                                                                      | Coding responses |
|----------------------------------------------------------------------------------------------------------------------------------------------------------------------------------------------------------------------------------------------|----------------------------------------------------------------------------------------------------------------------------------------------------------------------------------------------------------------------------------------------------------------------------------------------------------------------|------------------|
| Concept/Code                                                                                                                                                                                                                                 | Operationalization                                                                                                                                                                                                                                                                                                   |                  |
| <p>Issue Focus: Primary area of environmental concern</p> <p><i>This category captures the primary environmental issue which each group focuses on in their advocacy activities, as identified through words used on their websites.</i></p> | Record the environmental issue words used in their group name. For example ‘Yarra Climate Action Now’ focuses on climate. If unclear, search within the website text (e.g., on the ‘About’ page). Record the word used in the website to describe their issue focus (e.g., ‘Conservation’, ‘Climate’, or ‘Nuclear’), | Text             |
| <p>Geographical extent</p> <p><i>This category captures the area over which each group claims to undertake their advocacy activities</i></p>                                                                                                 | Record the geographic area described in their group name. For example, ‘Knox Environment Society’; Knox is a small town and therefore ‘local’ in geographic extent. Use the pre-existing framework of geographical extent of Local, State, Regional, National.                                                       | Text             |
| Founding date (Australia)                                                                                                                                                                                                                    | Use search terms provided in the code book to search within website text, for example: ‘founded’, ‘began’, ‘established’.                                                                                                                                                                                            | Date             |
| State they have staff/named positions                                                                                                                                                                                                        | Use search terms provided in the code book to search within website text, for example: ‘staff’, ‘team’.                                                                                                                                                                                                              | Yes/No           |
| Offline Activity                                                                                                                                                                                                                             |                                                                                                                                                                                                                                                                                                                      |                  |

---

*This category of codes identify activities promoted on websites which take place offline – i.e., in a physical location at a specific time*

---

|                    |                                                                                                                                                                                         |        |
|--------------------|-----------------------------------------------------------------------------------------------------------------------------------------------------------------------------------------|--------|
| Regular meetings   | Use search terms provided in the code book to capture where                                                                                                                             | Yes/No |
| Number of events   | website text uses words such as ‘events, ‘meeting’. Completed events are those which take place prior to the date of website download. Upcoming events are those which take place after | Number |
| Event Names (List) | the date of website download. Record the event names.                                                                                                                                   | Text   |

---

#### Online Activities

*This code captures activities promoted on websites which can be completed entirely online (in contrast to the Offline Activities code)*

---

|                                                            |                                                                                 |        |
|------------------------------------------------------------|---------------------------------------------------------------------------------|--------|
| E-newsletter subscription option                           |                                                                                 | Yes/No |
| Requests volunteers                                        |                                                                                 | Yes/No |
| Requests donations                                         |                                                                                 | Yes/No |
| Describe what donations used for (specifically)            |                                                                                 | Yes/No |
| Have a shop?                                               | Use search terms provided in the code book to capture where                     | Yes/No |
| Number of self-instigated online petitions                 | website text uses words such as ‘meeting’, ‘petition’, ‘pledge’,                | Number |
| Number of online petitions instigated by a different group | ‘donate’ and ‘volunteer’. Record the names of each online activity where given. | Number |
| Number of petitions where instigator is unclear            |                                                                                 | Number |
| Number of hard copy petitions available to download        |                                                                                 | Number |
| Number of online pledges                                   |                                                                                 | Number |
| Number of online emails/letters                            |                                                                                 | Number |

|                                     |        |
|-------------------------------------|--------|
| Number of online submissions        | Number |
| Number of campaign signups          | Number |
| Number of declarations              | Number |
| Number of other online actions      | Number |
| Number of online activities (total) | Number |

---

### Advocacy

*This code captures whether organizations describe themselves as doing campaigns, other advocacy, or projects.*

---

|                                         |                                                              |        |
|-----------------------------------------|--------------------------------------------------------------|--------|
| State they do campaigns                 |                                                              | Yes/No |
| Number of total campaigns               | Use search terms provided in the code book to capture where  | Number |
| Campaign Names (list)                   | website text uses words such as ‘campaign, and ‘advocacy’.   | Text   |
| Campaign Target (list if more than one) | Search text describing campaigns for a statement of the      | Text   |
| State they do projects                  | campaign target/s. Record the campaign and project names and | Yes/No |
| Project Name (list)                     | campaign target/s.                                           | Text   |

---

Note: In total 66 attributes were coded, however only attributes referred to in this paper are included here.
